# Supplementary material for: Are Women Really Less Competitive Than Men? Career Duration in Nordic and Alpine Skiing
Source: PubMed Central journal article supplement (PMC8022770; doi:10.3389/fsoc.2020.539766), 2021-01-20

APPENDIX

Table A1

Top Ten Prize Money Winners in the Alpine and the Nordic Ski World Cup 2017/18 (in CHF)

| Alpine Skiing |                        |         |                          |         |
|---------------|------------------------|---------|--------------------------|---------|
| 1             | Marcel Hirscher        | 669.681 | Mikaela Shiffrin         | 702.775 |
| 2             | Henrik Kristoffersen   | 345.071 | Wendy Holdener           | 273.794 |
| 3             | Beat Feuz              | 260.875 | Lindsey Vonn             | 264.430 |
| 4             | Aksel Lund Svindal     | 241.000 | Viktoria Rebensburg      | 262.436 |
| 5             | Kjetil Jansrud         | 210.250 | Sofia Goggia             | 261.398 |
| 6             | Vincent Kriechmayr     | 172.475 | Federica Brignone        | 223.493 |
| 7             | Thomas Dressen         | 168.800 | Tina Weirather           | 205.622 |
| 8             | Alexis Pinturault      | 142.232 | Petra Vlhova             | 203.955 |
| 9             | Andre Myhrer           | 138.259 | Frida Hansdotter         | 148.911 |
| 10            | Matthias Mayer         | 108.175 | Tessa Worley             | 139.131 |
| Nordic Skiing |                        |         |                          |         |
| 1             | Johannes Høsflot Klæbo | 207.500 | Heidi Weng               | 140.100 |
| 2             | Alexander Bolshunov    | 139.625 | Ingvild Flugstad Østberg | 111.775 |
| 3             | Sjur Roethe            | 85.875  | Jessica Diggins          | 109.075 |
| 4             | Simen Hegstad Krueger  | 61.050  | Marit Bjørgen            | 94.175  |
| 5             | Emil Iversen           | 59.675  | Krista Pärmäkoski        | 79.900  |
| 6             | Didrik Toenseth        | 58.775  | Charlotte Kalla          | 65.600  |
| 7             | Sergey Ustiugov        | 55.800  | Ragnhild Haga            | 61.000  |
| 8             | Federico Pellegrino    | 46.600  | Stina Nilsson            | 53.300  |
| 9             | Martin Johnsrud Sundby | 42.000  | Maiken Caspersen Falla   | 51.250  |
| 10            | Alex Harvey            | 35.550  | Sadie Bjornsen           | 41.075  |

Table A2

## Prize Money and World Cup Points by Rank

| Rank | Alpine Skiing    |                      | Nordic Skiing*   |                      |
|------|------------------|----------------------|------------------|----------------------|
|      | World Cup Points | Prize Money (in CHF) | World Cup Points | Prize Money (in CHF) |
| 1    | 100              | 45,000               | 100              | 15,000               |
| 2    | 80               | 20,000               | 80               | 10,000               |
| 3    | 60               | 10,000               | 60               | 5,000                |
| 4    | 50               | 7,000                | 50               | 3,500                |
| 5    | 45               | 5,000                | 45               | 2,500                |
| 6    | 40               | 4,000                | 40               | 1,500                |
| 7    | 36               | 3,000                | 36               | 1,000                |
| 8    | 32               | 2,400                | 32               | 750                  |
| 9    | 29               | 2,000                | 29               | 500                  |
| 10   | 26               | 1,800                | 26               | 250                  |
| 11   | 24               | 1,600                | 24               | -                    |
| 12   | 22               | 1,500                | 22               | -                    |
| 13   | 20               | 1,400                | 20               | -                    |
| 14   | 18               | 1,300                | 18               | -                    |
| 15   | 16               | 1,250                | 16               | -                    |
| 16   | 15               | 1,200                | 15               | -                    |
| 17   | 14               | 1,150                | 14               | -                    |
| 18   | 13               | 1,100                | 13               | -                    |
| 19   | 12               | 1,050                | 12               | -                    |
| 20   | 11               | 1,000                | 11               | -                    |
| 21   | 10               | 950                  | 10               | -                    |
| 22   | 9                | 900                  | 9                | -                    |
| 23   | 8                | 850                  | 8                | -                    |
| 24   | 7                | 800                  | 7                | -                    |
| 25   | 6                | 750                  | 6                | -                    |
| 26   | 5                | 700                  | 5                | -                    |
| 27   | 4                | 650                  | 4                | -                    |
| 28   | 3                | 600                  | 3                | -                    |
| 29   | 2                | 550                  | 2                | -                    |
| 30   | 1                | 500                  | 1                | -                    |

\* In Nordic skiing, prize money varies considerably across the different events. What all the events have in common, however, is that only the first ten finishers receive prize money and that the distribution of the prize purse is the same, irrespective of the amount of money.

Figure A1

The Distribution of World Cup Points and Prize Money in Alpine Skiing

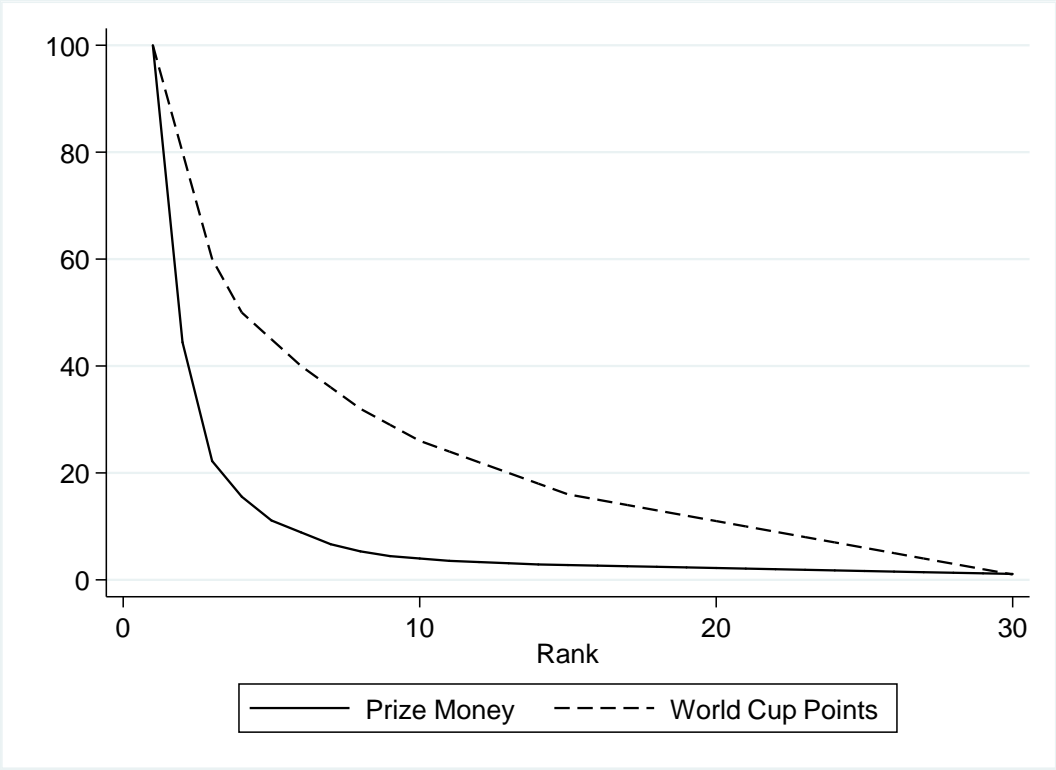

Supplement: table1.pdf [file table1.pdf]
